# Supplementary material for: Diagnostic value of endoscopic appearance during ductoscopy in patients with pathological nipple discharge
Source: BMC Cancer. 2017 May 2;17:300. doi: 10.1186/s12885-017-3288-3 (PMC5412041; doi:10.1186/s12885-017-3288-3)
Supplement: Additional file 1: — Detail data of malignant tumors. Description of form: It is the detail data of malignant tumors, which includes age range, duration, spontaneous, quadrants, depth, endoscopic description, pathologic description and so on. They are the base data for analyzation. (XLS 19 kb) [file 12885_2017_3288_MOESM1_ESM.xls]

## Sheet: Sheet1
Detail data of malignant tumors
Age	duration	spontaneous	bloody	side	location	depth	quadrant	Morphology	Hemorrhage	Base	Diameter(cm)	ER	PR	C-erbB-2	Case No.	Diagnosis	mammography	US	MR	Pathology	Sentinal Nodes	Level I/II/III nodes
≥40	12	1	1	Right	1	3	upper outer	irregular	Less or no	broad	1	_	_	_	764251	Malignancy	Normal	Normal	Structural distortion in right upper quadrant with size of 6.0*4.8*4.5cm, BIRADS5	IDC	1/1	0/12,0/3,0/3
≥40	12	1	1	Right	1	1	Behind nipple	stiffness	more	broad	1	+++	+	-	1152073	Malignancy	Not done	a mass with size of 0.7*0.6cm, which is accompanied with reflection	Not done	DCIS	Not done
≥40	8	1	1	Right	1	2	Lower outer	round	Less or no	narrow	1.2	+	+	-	723916	Malignancy	a node with size of 0.7cm, BIRADS2.	a mass with size of 1.1*0.6cm, with peripheral blood vessles	Not done	IDC	Not done	0/12,0/4
<40	3	1	1	Left	1	2	upper outer	irregular	Less or no	narrow	1.5	++	++	-	752252	Malignancy	Micro calcification and nodes in the left upper-outer quadrant, BIRADS4C	Normal	Mass	IDC	1/2	1/17, 0/1, 0/1
≥40	7	1	1	Left	3	3	upper inner	irregular	Less or no	narrow	0.3	+	-	+/-	833708	Malignancy	Micro calcification in the right lower outer quadrant, BIRADS4A	Normal	A mass of left lower outer quadrant, BIRADS4A，Little nodes of left breast, BIRADS3.	DCIS	Right:0/7. Left: 0/8
≥40	8	0	1	Left	3	6	upper outer	irregular	Less or no	broad	1.5	-	+	+/-	859674	Malignancy	Structural distortion in the left upper quadrant, BIRADS4B	A mass beneath the nipple areola with size of 1.2*1.1cm, ductal dilatation		IDC	0/3
≥40	9	1	1	Left	2	3	upper outer	irregular	Less or no	narrow	6	++	++	-	951524	Malignancy	Micro calcification of left inner upper quadrant, BIRADS4B	A structural distortion with left ductal dilation, 2.0*1.2*0.9cm，BIRADS4C	structural distortion of both breasts, BIRADS4C。	DCIS	0/9
≥40	1	1	1	Right	1	1	Behind nipple	strawberry	more	broad	1.5	+++	+++	-	1209227	Malignancy	Mass with structural distortion, BIRADS4C	A mass with size of 2.0*1.5cm	structural distortion with mass, BIRADS5	IDC
≥40	12	1	1	Right	3	3	Lower outer	strawberry	more	2	1.3	+	++	-	876640	Malignancy	Structural distortion of left outer upper quadrant, BIRADS4B	A mass of left breast, 1.4*1.1cm	Not done	IDC
<40	6	1	1	Left	2	3	Lower inner	strawberry	Less or no	1	0.2	0	0	0	839580	Malignancy	Normal	Normal	Not done	DCIS	Not done
